# Supplementary material
Source: publisher figshare collection journal article supplement (https://karger.figshare.com/ndownloader/files/25444679)
Supplement: Supplementary file 1 [file 25444679]

***Supplementary Materials***

***Expression of -1,4-galactosyltransferases during aging in* Caenorhabditis elegans**

# Overview

Supplementary Materials and Methods

Supplementary Table S1

Supplementary Table S2

Supplementary Table S3

Supplementary References

# Supplementary Materials and Methods

## Published high-throughput studies on C. elegans lifespan-regulation

For compilation of Supplementary Table S1, published gene lists (see supplementary references) were searched for *bre-4* (WBGene00000269), *sqv-3* (WBGene00005021) and *W02B12.11* (WBGene00012206). Only studies conducted in L4 or adult worms were considered. If published gene lists contained identifiers other than WormBase IDs, these identifiers were converted to WormBase IDs using WormMine (<http://intermine.wormbase.org/tools/wormmine/begin.do>). Studies selected for this analysis cover the two longevity-models of interest in our work (*daf-2* [1, 2] and *glp-1* [3]), plus long-lived mitochondrial mutants [2, 4] and *eat-2*, a genetic model for dietary restriction [5], two timecourse studies [6, 7], and studies that identified targets of selected lifespan-regulatory transcription factors (ATFS-1 [4], DAF-12 [8], DAF-16 [9-14], HIF-1 [4, 15, 16], HSF-1 [17, 18], SKN-1 [3, 19], , UNC-62 [20] and XBP-1 [21]).

## Transcription factor binding to C. elegans B4GALT genes

The full list of worm transcription factor binding sites published by the modERN-consortium (Supplementary Ref. [22], Table S6B) was analysed for the presence of sites in *B4GALT*-genes in young adulthood and/or L4 using custom R-scripts. CHIP-seq peaks (binding sites) were assigned to a transcript if they overlapped with the region between 500 bp upstream and 300 bp downstream of the transcriptional start site [23]. A gene was considered a target of a given transcription factor if at least one of its transcripts was associated with at least one peak. Information on chromosomal locations of transcriptional start sites was extracted from the Wormbase version WS271 canonical gene set gtf-file (<ftp://ftp.wormbase.org/pub/wormbase/releases/WS271/species/c_elegans/PRJNA13758/>). See supplementary reference [24] for a recent review covering the transcription factors considered in our analyses.

## Primers for qPCR

qPCR-primers used in this study are listed in Supplementary Table S1. Primers for reference genes *cdc-42*, *tba-1* and *Y45F10D.4* were published previously [25].

# Supplementary References

1. Seo M, Park S, Nam HG, Lee SJ. RNA helicase SACY-1 is required for longevity caused by various genetic perturbations in Caenorhabditis elegans. Cell Cycle. 2016 Jul 17;15(14):1821-9.

2. Senchuk MM, Dues DJ, Schaar CE, Johnson BK, Madaj ZB, Bowman MJ, et al. Activation of DAF-16/FOXO by reactive oxygen species contributes to longevity in long-lived mitochondrial mutants in Caenorhabditis elegans. PLoS Genet. 2018 Mar;14(3):e1007268.

3. Steinbaugh MJ, Narasimhan SD, Robida-Stubbs S, Moronetti Mazzeo LE, Dreyfuss JM, Hourihan JM, et al. Lipid-mediated regulation of SKN-1/Nrf in response to germ cell absence. Elife. 2015 Aug 24;4.

4. Wu Z, Senchuk MM, Dues DJ, Johnson BK, Cooper JF, Lew L, et al. Mitochondrial unfolded protein response transcription factor ATFS-1 promotes longevity in a long-lived mitochondrial mutant through activation of stress response pathways. BMC Biol. 2018 Dec 18;16(1):147.

5. Heestand BN, Shen Y, Liu W, Magner DB, Storm N, Meharg C, et al. Dietary restriction induced longevity is mediated by nuclear receptor NHR-62 in Caenorhabditis elegans. PLoS Genet. 2013;9(7):e1003651.

6. Mansfeld J, Urban N, Priebe S, Groth M, Frahm C, Hartmann N, et al. Branched-chain amino acid catabolism is a conserved regulator of physiological ageing. Nat Commun. 2015 Dec 1;6:10043.

7. Heintz C, Doktor TK, Lanjuin A, Escoubas C, Zhang Y, Weir HJ, et al. Splicing factor 1 modulates dietary restriction and TORC1 pathway longevity in C. elegans. Nature. 2017 Jan 5;541(7635):102-06.

8. Fisher AL, Lithgow GJ. The nuclear hormone receptor DAF-12 has opposing effects on Caenorhabditis elegans lifespan and regulates genes repressed in multiple long-lived worms. Aging Cell. 2006 Apr;5(2):127-38.

9. Murphy CT, McCarroll SA, Bargmann CI, Fraser A, Kamath RS, Ahringer J, et al. Genes that act downstream of DAF-16 to influence the lifespan of Caenorhabditis elegans. Nature. 2003 Jul 17;424(6946):277-83.

10. Tepper RG, Ashraf J, Kaletsky R, Kleemann G, Murphy CT, Bussemaker HJ. PQM-1 complements DAF-16 as a key transcriptional regulator of DAF-2-mediated development and longevity. Cell. 2013 Aug 1;154(3):676-90.

11. Chen AT, Guo C, Itani OA, Budaitis BG, Williams TW, Hopkins CE, et al. Longevity Genes Revealed by Integrative Analysis of Isoform-Specific daf-16/FoxO Mutants of Caenorhabditis elegans. Genetics. 2015 Oct;201(2):613-29.

12. Kaletsky R, Lakhina V, Arey R, Williams A, Landis J, Ashraf J, et al. The C. elegans adult neuronal IIS/FOXO transcriptome reveals adult phenotype regulators. Nature. 2016 Jan 7;529(7584):92-6.

13. Amrit FR, Steenkiste EM, Ratnappan R, Chen SW, McClendon TB, Kostka D, et al. DAF-16 and TCER-1 Facilitate Adaptation to Germline Loss by Restoring Lipid Homeostasis and Repressing Reproductive Physiology in C. elegans. PLoS Genet. 2016 Feb;12(2):e1005788.

14. McCormick M, Chen K, Ramaswamy P, Kenyon C. New genes that extend Caenorhabditis elegans' lifespan in response to reproductive signals. Aging Cell. 2012 Apr;11(2):192-202.

15. Angeles-Albores D, Puckett Robinson C, Williams BA, Wold BJ, Sternberg PW. Reconstructing a metazoan genetic pathway with transcriptome-wide epistasis measurements. Proc Natl Acad Sci U S A. 2018 Mar 27;115(13):E2930-E39.

16. Pender CL, Horvitz HR. Hypoxia-inducible factor cell non-autonomously regulates C. elegans stress responses and behavior via a nuclear receptor. Elife. 2018 Jul 16;7.

17. Brunquell J, Morris S, Lu Y, Cheng F, Westerheide SD. The genome-wide role of HSF-1 in the regulation of gene expression in Caenorhabditis elegans. BMC Genomics. 2016 Aug 5;17:559.

18. Sural S, Lu TC, Jung SA, Hsu AL. HSB-1 Inhibition and HSF-1 Overexpression Trigger Overlapping Transcriptional Changes To Promote Longevity in Caenorhabditis elegans. G3 (Bethesda). 2019 May 7;9(5):1679-92.

19. Oliveira RP, Porter Abate J, Dilks K, Landis J, Ashraf J, Murphy CT, et al. Condition-adapted stress and longevity gene regulation by Caenorhabditis elegans SKN-1/Nrf. Aging Cell. 2009 Sep;8(5):524-41.

20. Van Nostrand EL, Sanchez-Blanco A, Wu B, Nguyen A, Kim SK. Roles of the developmental regulator unc-62/Homothorax in limiting longevity in Caenorhabditis elegans. PLoS Genet. 2013;9(2):e1003325.

21. Imanikia S, Ozbey NP, Krueger C, Casanueva MO, Taylor RC. Neuronal XBP-1 Activates Intestinal Lysosomes to Improve Proteostasis in C. elegans. Curr Biol. 2019 Jul 22;29(14):2322-38 e7.

22. Kudron MM, Victorsen A, Gevirtzman L, Hillier LW, Fisher WW, Vafeados D, et al. The ModERN Resource: Genome-Wide Binding Profiles for Hundreds of Drosophila and Caenorhabditis elegans Transcription Factors. Genetics. 2018 Mar;208(3):937-49.

23. Gerstein MB, Lu ZJ, Van Nostrand EL, Cheng C, Arshinoff BI, Liu T, et al. Integrative analysis of the Caenorhabditis elegans genome by the modENCODE project. Science. 2010 Dec 24;330(6012):1775-87.

24. Denzel MS, Lapierre LR, Mack HID. Emerging topics in C. elegans aging research: Transcriptional regulation, stress response and epigenetics. Mech Ageing Dev. 2019 Jan;177:4-21.

25. Mack HID, Zhang P, Fonslow BR, Yates JR. The protein kinase MBK-1 contributes to lifespan extension in daf-2 mutant and germline-deficient Caenorhabditis elegans. Aging (Albany NY). 2017 May 25;9(5):1414-32.
